# Supplementary material
Source: Elsevier journal article supplement (https://www.sciencedirect.com/science/article/pii/S1885585718302196)
Supplement: mmc1 [file S1885585718302196:mmc1.pdf]

## SUPPLEMENTARY MATERIAL

### Table 1 of the supplementary material

Recalculated Predictive Model After Exclusion of Patients Who Died During Hospital Admission

|                                                   | OR (95%CI)         | <i>P</i> |
|---------------------------------------------------|--------------------|----------|
| non-Shockable rhythm                              | 11.79 (3.16-18.63) | <.01     |
| Age (one additional year)                         | 1.05 (1.01-1.12)   | .01      |
| Lactate level (one additional mmol/L)             | 1.23 (1.09-1.43)   | .04      |
| Time Elapsed to return of spontaneous circulation | 1.02 (1.00-1.06)   | .03      |
| Diabetes                                          | 3.65 (1.56-12.54)  | .02      |

95%CI, confidence interval; OR, adjusted odds ratio.

## Table 2 of the supplementary material

Recalculated Predictive Model After Exclusion of Patients With Noncardiac Causes of out-of-Hospital Cardiac Arrest

|                                                   | OR (95%CI)          | <i>P</i> |
|---------------------------------------------------|---------------------|----------|
| non-Shockable rhythm                              | 43.01 (39.43-47.08) | <.01     |
| Age (1 additional year)                           | 1.05 (1.01-1.09)    | .03      |
| Lactate level (one additional mmol/L)             | 1.55 (1.20-2.00)    | <.01     |
| Time Elapsed to return of spontaneous circulation | 1.05 (1.00-1.09)    | .04      |
| Diabetes                                          | 6.57 (1.55-12.93)   | .01      |

95%CI, confidence interval; OR, adjusted odds ratio.

Figure of the supplementary material

Receiver operator characteristic curve for predictive model applied to in hospital survivors (n = 115).

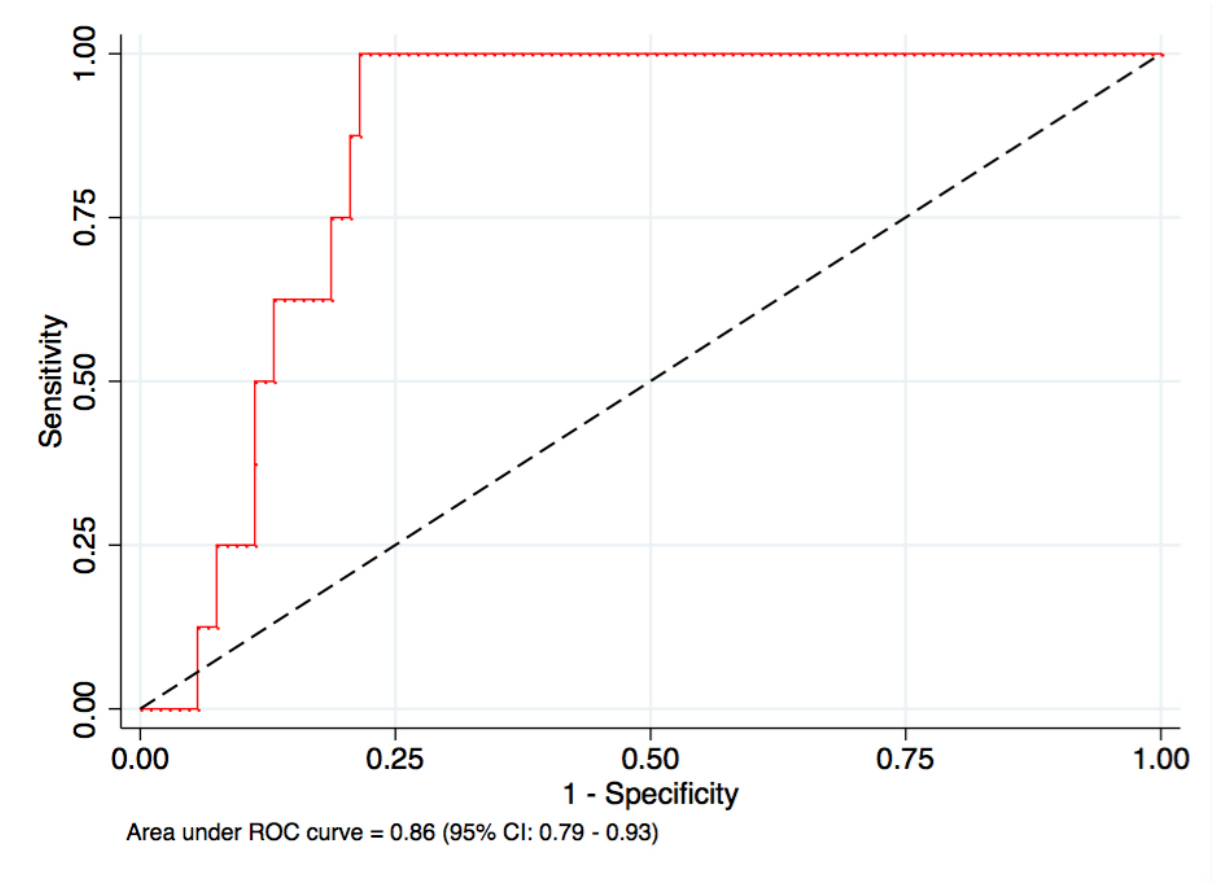

95%CI, confidence interval; ROC, receiver operator characteristic.
